# Supplementary material for: The Activity of YCA1 Metacaspase Is Regulated by Reactive Sulfane Sulfur via Persulfidation in Saccharomyces cerevisiae
Source: MDPI journal article supplement (doi:10.3390/antiox13050589), 2024-05-10
Supplement: s1 [file s1]

**Table S1.** The strains and plasmids used in this study.

| Strain/plasmid               | Relevant characteristic(s)                                                            | source     |
|------------------------------|---------------------------------------------------------------------------------------|------------|
| <b><i>S. cerevisiae</i></b>  |                                                                                       |            |
| BY4742                       | <i>MATa his3Δ1 leu2Δ0 lys2Δ0 ura3Δ0</i>                                               | Lab stock  |
| BY4742 <i>Δcys3</i>          | <i>Δcys3::loxp</i>                                                                    | This study |
| BY4742 <i>Δcys3 Δyca1</i>    | <i>Δcys3::loxp Δyca1::loxp</i>                                                        |            |
| BY4742 <i>BIR1-GFP</i>       | <i>BIR1-GFP(S65T)-HIS3</i>                                                            | This study |
| BY4742 <i>Δcys3 BIR1-GFP</i> | <i>Δcys3::loxp BIR1-GFP(S65T)-HIS3</i>                                                | This study |
| <b><i>E. coli</i></b>        |                                                                                       |            |
| DH5α                         | <i>supE44 ΔlacU169(Φ80dlacZΔM15) hsdR17 recA1 endA1</i><br><i>gyrA96 thi-1 relA1</i>  | Lab stock  |
| BL21(DE3)                    | <i>F-ompT hsdSB (rB-mB-) gal (λ1857 ind1 Sam7 nin5 lacUV5</i><br><i>T7gene1) dcm.</i> | Lab stock  |
| <b>Plasmid</b>               |                                                                                       |            |
| pUG6                         | Template plasmid                                                                      | Lab stock  |
| pFA6a-GFP(S65T)-His3MX6      | Template plasmid                                                                      | Lab stock  |
| pET21b                       | Expression plasmid in <i>E. coli</i>                                                  | Lab stock  |
| pET15b                       | Expression plasmid in <i>E. coli</i>                                                  | Lab stock  |
| pET21b- <i>YCA1</i>          | <i>YCA1</i> in pET21b, control by IPTG-induced lac promoter                           | This study |
| pET15b- <i>BIR1</i>          | <i>BIR1</i> in pET15b, control by IPTG-induced lac promoter                           | This study |

**Table S2.** List of gene with significant changes in transcription levels.

|              | gene             | Log <sub>2</sub> (Fold change) | p-value    |
|--------------|------------------|--------------------------------|------------|
|              | <i>spl2</i>      | 2.5752                         | 1.72E-62   |
|              | <i>pho84</i>     | 2.5095                         | 1.56 E-12  |
|              | <i>ydr316w-b</i> | 2.473                          | 0.0023443  |
|              | <i>met17</i>     | 2.3628                         | 3.46 E-16  |
|              | <i>met14</i>     | 2.3466                         | 2.55 E-10  |
|              | <i>pho12</i>     | 2.2886                         | 2.86E-141  |
|              | <i>ddr2</i>      | 2.2731                         | 6.47E-45   |
|              | <i>met3</i>      | 2.1144                         | 4.20E-286  |
|              | <i>ylr466c-b</i> | 2.0996                         | 2.46E-20   |
|              | <i>pho89</i>     | 2.057                          | 3.59E-94   |
|              | <i>sul2</i>      | 1.9295                         | 9.64E-210  |
|              | <i>tsl1</i>      | 1.9015                         | 1.36E-133  |
|              | <i>dpi8</i>      | 1.8684                         | 3.06E-26   |
|              | <i>met5</i>      | 1.7585                         | 4.25E-255  |
|              | <i>yfl064c</i>   | 1.7105                         | 8.39E-06   |
|              | <i>vtc3</i>      | 1.6632                         | 1.74E-287  |
|              | <i>hsp82</i>     | 1.6142                         | 5.54E-22   |
|              | <i>hsp42</i>     | 1.5641                         | 2.99E-53   |
|              | <i>pho11</i>     | 1.5456                         | 1.14E-27   |
| Up-regulated | <i>met10</i>     | 1.5018                         | 5.01E-178  |
|              | <i>pho5</i>      | 1.4952                         | 2.32E-106  |
|              | <i>mht1</i>      | 1.4498                         | 2.87E-47   |
|              | <i>yfl065c</i>   | 1.4458                         | 0.00063113 |
|              | <i>str3</i>      | 1.3663                         | 3.57E-28   |
|              | <i>ylr108c</i>   | 1.3193                         | 6.33E-67   |
|              | <i>glk1</i>      | 1.3106                         | 1.69E-122  |
|              | <i>gsy1</i>      | 1.275                          | 1.92E-42   |
|              | <i>met16</i>     | 1.2458                         | 1.21E-44   |
|              | <i>hsp12</i>     | 1.2345                         | 0.00013133 |
|              | <i>yrf1-1</i>    | 1.2283                         | 1.59E-09   |
|              | <i>hsp78</i>     | 1.2188                         | 9.10E-47   |
|              | <i>yol162w</i>   | 1.215                          | 0.0029863  |
|              | <i>phm6</i>      | 1.2129                         | 7.08E-16   |
|              | <i>yll066c</i>   | 1.2091                         | 4.59E-44   |
|              | <i>whi2</i>      | 1.1887                         | 7.20E-136  |
|              | <i>mmp1</i>      | 1.1862                         | 1.81E-87   |
|              | <i>mup1</i>      | 1.182                          | 3.47E-167  |
|              | <i>ypr204w</i>   | 1.1734                         | 1.07E-18   |
|              | <i>btn2</i>      | 1.1629                         | 1.93E-29   |
|              | <i>cyc7</i>      | 1.1489                         | 1.85E-05   |
|              | <i>hsp104</i>    | 1.1481                         | 4.13E-64   |

|                |                  |         |            |
|----------------|------------------|---------|------------|
|                | <i>opt1</i>      | 1.1402  | 4.73E-127  |
|                | <i>yfl067w</i>   | 1.1321  | 1.20E-12   |
|                | <i>hsp26</i>     | 1.1245  | 1.19E-39   |
|                | <i>hxx1</i>      | 1.1108  | 9.82E-52   |
|                | <i>yrf1-5</i>    | 1.107   | 1.52E-11   |
|                | <i>gad1</i>      | 1.0961  | 4.80E-50   |
|                | <i>cwp1</i>      | 1.0955  | 5.26E-136  |
|                | <i>gpm2</i>      | 1.0708  | 4.44E-08   |
| Up-regulated   | <i>pdh6</i>      | 1.0708  | 0.0037978  |
|                | <i>sfc1</i>      | 1.0643  | 0.0011762  |
|                | <i>cur1</i>      | 1.0489  | 4.74E-14   |
|                | <i>yol163w</i>   | 1.0487  | 0.0012575  |
|                | <i>seol</i>      | 1.0376  | 1.97E-05   |
|                | <i>cit1</i>      | 1.0268  | 2.15E-100  |
|                | <i>met1</i>      | 1.0125  | 1.47E-47   |
|                | <i>yfl066c</i>   | 1.0106  | 2.29E-08   |
|                | <i>sam3</i>      | 1.0062  | 6.86E-109  |
|                | <i>tis11</i>     | 1.0059  | 9.67E-14   |
|                | <i>snr189</i>    | -1.0043 | 0.0026016  |
|                | <i>mael</i>      | -1.0343 | 6.90E-117  |
|                | <i>aro5</i>      | -1.0689 | 6.64E-27   |
|                | <i>arg4</i>      | -1.0777 | 1.12E-19   |
|                | <i>ypr145c-a</i> | -1.0788 | 2.18E-42   |
|                | <i>ural</i>      | -1.1201 | 2.37E-107  |
|                | <i>pbi1</i>      | -1.1527 | 1.52E-129  |
|                | <i>bsc1</i>      | -1.1614 | 1.43E-54   |
| Down-regulated | <i>prm7</i>      | -1.2831 | 4.82E-30   |
|                | <i>snr35</i>     | -1.3268 | 9.56E-06   |
|                | <i>cpa2</i>      | -1.5119 | 6.04E-22   |
|                | <i>arg3</i>      | -1.5172 | 8.96E-25   |
|                | <i>arg1</i>      | -1.553  | 1.62E-28   |
|                | <i>srd1</i>      | -1.6645 | 9.09E-60   |
|                | <i>tf(gaa)h1</i> | -1.8982 | 0.010531   |
|                | <i>pau9</i>      | -2.0243 | 0.00029412 |
|                | <i>ybl107w-a</i> | -3.6909 | 0.0035597  |
|                | <i>tk(cuu)f</i>  | -4.2844 | 0.013111   |

A

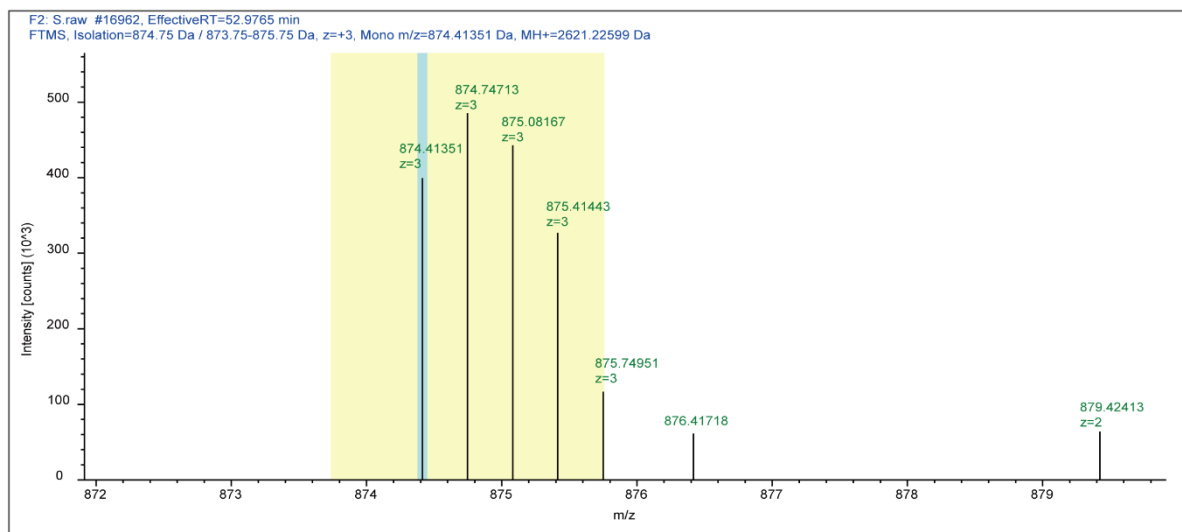

B

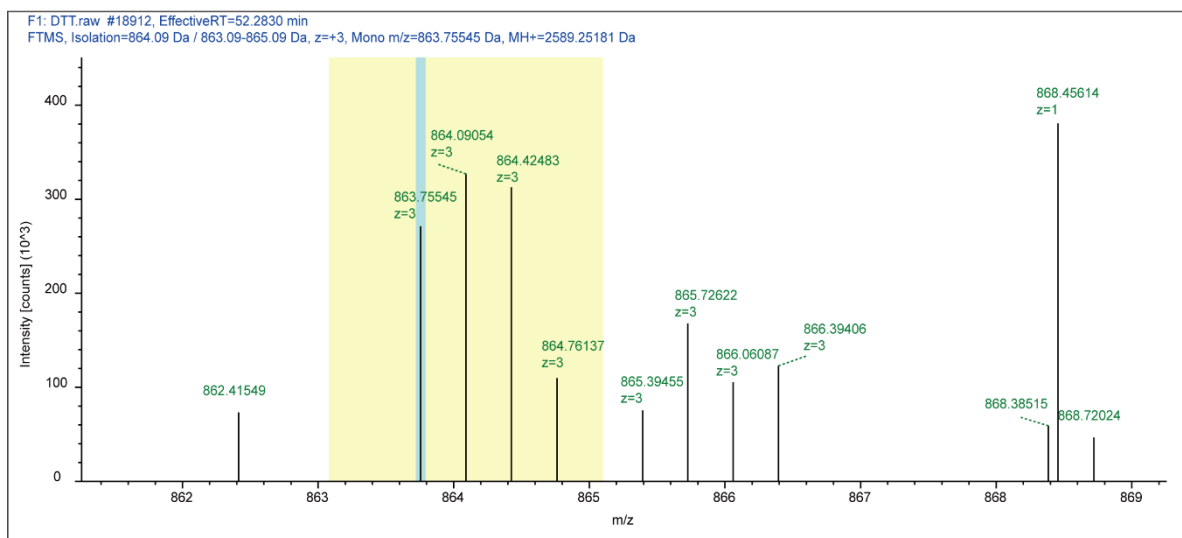

**Figure S1.** MS spectra of the Cys<sub>276</sub> containing peptide from YCA1. (A) The peptide from HS<sub>n</sub>H-reacted YCA1. (B) The peptide from DTT-reacted YCA1. “Z” represents the charge carried by the detected peptide segment. The molecular weights marked in blue indicate the detected values. The actual molecular weight is obtained by multiplying the detected molecular weight by the charge number.

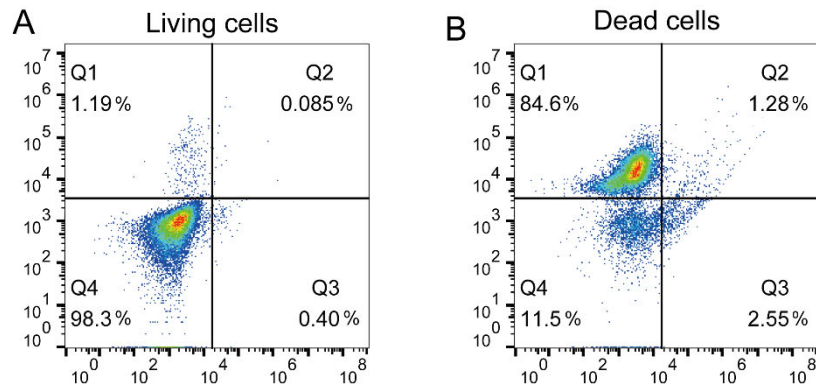

**Figure S2.** Flow cytometry analysis of BY4742 living and dead cells. A total of 20,000 stained cells were analyzed using flow cytometry to classify them into four quadrants. The cells underwent V-FITC and PI double staining. Viable cells (A) consisted of logarithmically growing yeast cells, while dead cells (B) were yeast cells killed by high temperature.
